1 **Factors associated with the near miss of pregnant and postpartum women hospitalized by**  
2 **Covid-19**

3  
4 **Maternal near miss by Covid-19**

5  
6 Ana Carolina Schultz da Silva<sup>1</sup>, Márcia Moroskoski<sup>2</sup>, Natan Nascimento de Oliveira<sup>2</sup>, Franciele Aline  
7 Machado de Brito<sup>2</sup>, Marcela de Andrade Pereira Silva<sup>3</sup>, Maria Aparecida Salci<sup>2</sup>, Lígia Carreira<sup>2</sup>, João  
8 Ricardo Nickenig Vissoci<sup>4-5</sup>, Rosana Rosseto de Oliveira<sup>2</sup>

9  
10 <sup>1</sup>Nursing, Centro Universitário Uningá.

11 <sup>2</sup> Nursing Departament, Universidade Estadual de Maringá, Maringá, Brazil.

12 <sup>3</sup> Health Science Departament, Universidade Estadual de Maringá, Maringá, Brazil.

13 <sup>4</sup>Division of Emergency Medicine, Duke University Medical Center, Durham, North Carolina, USA.

14 <sup>5</sup>Duke Global Health Institute, Duke University, Durham, North Carolina, USA.

15

16 Corresponding author: João Ricardo Nickenig Vissoci. E-mail: [joao.vissoci@duke.edu](mailto:joao.vissoci@duke.edu)

17

18 **ABSTRACT**

19 **Objective:** To analyze the factors associated with maternal near miss due to Covid-19 in Brazil.

20 **Method:** cross-sectional study that assessed the cases of pregnant and postpartum women  
21 hospitalized with SARS due to Covid-19, aged between 10 and 49 years and from March 2020 to  
22 March 2022. Secondary data available in the Influenza Epidemiological Surveillance Information  
23 System (SIVEP-Flu) were used. Data were analyzed using SPSS statistical software, with univariate  
24 analysis followed by logistic regression. **Results:** the significant independent factors associated with  
25 near miss in pregnant postpartum women due to Covid-19 were black/brown race, O2 saturation

**NOTE:** This preprint reports new research that has not been certified by peer review and should not be used to guide clinical practice.

26 <95%, dyspnea, comorbidities, need for invasive and non-invasive ventilatory support. **Conclusion:**  
27 the factors associated with near misses in pregnant and postpartum women with covid-19 reveal  
28 characteristics and risks inherent to the pathophysiology of the disease that contribute to worsening  
29 the condition.

30

31 **Keywords:** Coronavirus Infections; Near Miss; Maternal Mortality; Epidemiology; Nursing.

32

### 33 **INTRODUCTION**

34

35 In December 2019, the world was surprised by the emergence of a new virus in China, SARS-  
36 CoV-2. Already in March 2020, the World Health Organization (WHO) had declared it a pandemic  
37 due to its high transmissibility and the alarming number of cases and deaths in several countries and  
38 continents.<sup>1</sup>

39 Studies show an increased mortality rate from Covid-19 to the vulnerability of different  
40 population groups, with or without morbidity, and in different age groups.<sup>2</sup> Among the most  
41 vulnerable groups are pregnant women, who are susceptible to severe infections due to physiological  
42 changes during pregnancy.<sup>3</sup>

43 In addition, although research has not shown evidence of vertical transmission of the virus, there is  
44 an increased prevalence of preterm birth, miscarriage, emergency cesarean section, intrauterine  
45 growth restriction, maternal death, maternal near misses, and other complications during pregnancy  
46 in women with Covid-19.<sup>4</sup>

47 In Brazil, the Covid-19 Observatory of the Oswaldo Cruz Foundation (Fiocruz) announced in  
48 2021 that the country has the highest number of maternal deaths caused by the Covid-19 virus.<sup>5</sup>  
49 Another study showed that about eight out of 10 pregnant and postpartum women who have become

50 victims of the new coronavirus in the world are Brazilian.<sup>6</sup> This rate could be even higher due to  
51 underreporting of cases and the fact that many women of reproductive age (10-49 years) have died.<sup>7</sup>

52 Reducing maternal mortality is a global challenge for health systems and has become even  
53 more challenging with the advent of Covid-19.<sup>8</sup> The United Nations (UN), through the Sustainable  
54 Development Goals, agreed to the Brazilian reality of maternal mortality rate not exceeding 30 deaths  
55 per 100,000 live births by 2030.<sup>9</sup> However, in 2021, this rate was 107 deaths per 100,000 births.<sup>10</sup>

56 The target set by the United Nations will only be possible through measures to improve the  
57 capacity to care for pregnant women before, during, and after childbirth.<sup>8</sup> On the other hand, non-  
58 compliance will indicate the ineffectiveness of public policies aimed at women, since most cases are  
59 considered preventable deaths.<sup>11</sup>

60 In this sense, one of the strategies to reduce maternal mortality is to study the Near Miss  
61 Materno (NMM), which consists of analyzing cases in which the woman almost died due to a serious  
62 complication that occurred during pregnancy, childbirth, or the puerperium.<sup>12</sup>

63 It is believed that hospitalization of a pregnant or postpartum woman in intensive care for  
64 Covid-19 could be avoided through prevention and health promotion. Therefore, it is of paramount  
65 importance to study and train professionals working in these areas to recognize the factors associated  
66 with complications and thus avoid them.<sup>13</sup>

67 Therefore, this study aims to analyze the factors associated with maternal near misses due to  
68 Covid-19 in Brazil, considering the importance of the topic and the need to deepen the discussion and  
69 knowledge about this disease.

70

## 71 **METHOD**

72

73 This is an observational, cross-sectional, and analytical study of notifications of pregnant and  
74 postpartum women hospitalized for Covid-19 in Brazil from March 2020 to March 2022. The study

75 is based on the STROBE (Strengthening the Reporting of Observational Studies in Epidemiology)  
76 tool, which aims to strengthen the appropriate reporting of observational studies in epidemiology.<sup>14</sup>

77 The notifications analyzed correspond to the 27 states of the country, with an estimated  
78 population of 214.3 million inhabitants in 2022.<sup>15</sup> The age range of 10 to 49 years was used because  
79 it is defined in Brazil as the group of women of childbearing age<sup>16</sup>, filtering also the cases of pregnant  
80 and postpartum women positive to Covid-19.

81 The notifications used were recorded in the public records of the Influenza Epidemiological  
82 Information System (SIVEP-Influenza) of the Ministry of Health (MS). SIVEP-Influenza is a  
83 surveillance program for the influenza virus in the country, from the sentinel surveillance network of  
84 the influenza syndrome. Due to the pandemic, the Health Surveillance Secretariat of the Ministry of  
85 Health (SVS/MS) adapted the system to include Covid-19 data.<sup>17</sup> The data used in the study were  
86 extracted from the platform on April 15, 2021 using R software.

87 To achieve the objective of analyzing the factors associated with maternal near misses due to  
88 Covid-19, the dependent variable was the hospitalization of the pregnant and/or postpartum woman  
89 for Covid-19 in the ICU. Pregnant and postpartum women who died regardless of ICU or ward  
90 admission were excluded. Independent variables were grouped into sociodemographic characteristics  
91 (race, age, education, area of residence, and region); signs and symptoms (fever, sore throat, dyspnea,  
92 respiratory distress, saturation <95%, vomiting, diarrhea, and other symptoms); pre-existing  
93 conditions (comorbidity, cardiac, hematologic, neurologic, renal, hepatic, Down syndrome, asthma,  
94 diabetes, obesity, pneumonia, immunodeficiency); and clinical characteristics (obstetric population,  
95 ventilatory support, nosocomial infection, influenza vaccine, Covid-19 vaccine, antiviral).

96 The statistic used was logistic regression, which aims to construct a model from a set of  
97 observations that allows the prediction of the values taken by a categorical variable, in order to  
98 identify the factors that characterize each group of sick individuals compared to healthy individuals.<sup>18</sup>  
99 Thus, in the univariate regression analysis, the variables with  $p < 0.20$  were selected.

100 The forward stepwise logistic regression model was then used, and the measures of association  
101 were the adjusted odds ratio (adjusted OR) with a 95% confidence interval (CI), taking into account  
102 the absence of multicollinearity in the model. Data were analyzed using the Statistical Package for  
103 the Social Sciences (SPSS, version 20.1, IBM, USA).

104 The study used secondary and public domain databases and did not require the approval of an  
105 ethics committee, according to the recommendations of Resolution No. 510/2016 of the National  
106 Health Council.<sup>19</sup>

107

## 108 RESULTS

109

110 We analyzed 19,908 hospitalizations of pregnant and postpartum women with Covid-19 that  
111 occurred in Brazil between March 2020 and March 2022. Of these total hospitalizations, 16,358  
112 (82.16%) were pregnant women and 3,550 (17.84%) were postpartum women. Considering the  
113 obstetric population, 4,132 (20.75%) experienced the situation of a near miss due to Covid-19,  
114 represented by ICU admission, and 15,776 (79.25%) were admitted to wards (Table 1).

115 The sociodemographic aspects of pregnant and postpartum women with Covid-19  
116 hospitalized in Brazil are shown in Table 1. The odds of ICU admission were higher in women aged  
117 35 years and older (OR=1.41; CI=1.309-1.525), illiterate (OR=1.81; CI=1.087-3.021) and living in  
118 peri-urban areas (OR=1.67; CI=1.072-2.603). Among the Brazilian regions, the Southeast region had  
119 the highest odds ratio for the outcome (OR=1.86; CI=1.63-2.11) (Table 1).

120

121 Table 1 – Univariate analysis of hospitalizations of pregnant and postpartum women with Covid-19,  
122 according to sociodemographic characteristics. Brazil, 2020-2022

| Region | UTI      |       | Infirmery |       | Total | OR  | IC        | p-value |
|--------|----------|-------|-----------|-------|-------|-----|-----------|---------|
|        | n (4132) | %     | n (15776) | %     |       |     |           |         |
| South  | 644      | 15,59 | 2796      | 17,72 | 3440  | 1,4 | 1,21-1,62 | <0,001  |

|                   |      |       |       |       |       |      |             |        |
|-------------------|------|-------|-------|-------|-------|------|-------------|--------|
| Southeast         | 1969 | 47,65 | 6449  | 40,88 | 8418  | 1,86 | 1,63-2,11   | <0,001 |
| Midwest           | 397  | 9,61  | 1325  | 8,40  | 1722  | 1,82 | 1,55-2,15   | <0,001 |
| Northeast         | 808  | 19,55 | 3297  | 20,90 | 4105  | 1,49 | 1,29-1,72   | <0,001 |
| North             | 314  | 7,60  | 1909  | 12,10 | 2223  | -    | -           | -      |
| <b>Age</b>        |      |       |       |       |       |      |             |        |
| <20               | 259  | 6,27  | 1456  | 9,23  | 1715  | 0,73 | 0,634-0,838 | <0,001 |
| 20 to 34          | 2578 | 62,39 | 10564 | 66,96 | 13142 | -    | -           | -      |
| ≥35               | 1295 | 31,34 | 3756  | 23,81 | 5051  | 1,41 | 1,309-1,525 | <0,001 |
| <b>Race/Color</b> |      |       |       |       |       |      |             |        |
| White             | 1566 | 37,90 | 5685  | 36,04 | 7251  | -    | -           | -      |
| Black/Brown       | 1885 | 45,62 | 7619  | 48,29 | 9504  | 0,90 | 0,833-0,968 | 0,005  |
| Yellow            | 28   | 0,68  | 113   | 0,72  | 141   | 0,90 | 0,593-1,366 | 0,619  |
| Indigenous        | 12   | 0,29  | 138   | 0,87  | 150   | 0,32 | 0,175-0,571 | <0,001 |
| <b>Education</b>  |      |       |       |       |       |      |             |        |
| Illiterate        | 24   | 0,58  | 44    | 0,28  | 68    | 1,81 | 1,087-3,021 | 0,023  |
| Elementary        | 414  | 10,02 | 1930  | 12,23 | 2344  | 0,71 | 0,609-0,835 | <0,001 |
| High School       | 815  | 19,72 | 3761  | 23,84 | 4576  | 0,72 | 0,626-0,828 | <0,001 |
| College           | 366  | 8,86  | 1216  | 7,71  | 1582  | -    | -           | -      |
| <b>Zone</b>       |      | 0,00  |       | 0,00  |       |      |             |        |
| Urban             | 3391 | 82,07 | 13352 | 84,63 | 16743 | -    | -           | -      |
| Rural             | 216  | 5,23  | 1018  | 6,45  | 1234  | 0,83 | 0,718-0,972 | 0,02   |
| Peri-urban        | 28   | 0,68  | 66    | 0,42  | 94    | 1,67 | 1,072-2,603 | 0,023  |

123

124 Regarding the signs and symptoms of hospitalized pregnant and postpartum women with  
 125 Covid-19 (Table 2), the results show that having had a fever (OR=1.47; CI=1.362-1.591), cough  
 126 (OR=1.71; CI=1. 562-1.869), dyspnea (OR=4.57; CI=4.177-5.012), respiratory distress (OR=3.51;  
 127 CI=3.231-3.810) and O2 saturation <95% (OR=5.62; CI=5.174-6.100) were factors associated with  
 128 ICU admission. The sore throat was a protective factor for ICU admission (OR=0.77; CI=0.700-  
 129 0.843).

130

131 Table 2 – Univariate Analysis of Hospitalizations of Pregnant and Postpartum Women with Covid-  
 132 19 by Signs and Symptoms Brazil, 2020-2022

|                    | UTI      |       | Infirmary |       | Total | OR   | IC          | p-value |
|--------------------|----------|-------|-----------|-------|-------|------|-------------|---------|
|                    | n (4132) | %     | n (15776) | %     |       |      |             |         |
| <b>Fever</b>       |          |       |           |       |       |      |             |         |
| Yes                | 2333     | 56,46 | 7577      | 48,03 | 9910  | 1,47 | 1,362-1,591 | <0,001  |
| No                 | 1190     | 28,80 | 5689      | 36,06 | 6879  | -    | -           | -       |
| <b>Cough</b>       |          |       |           |       |       |      |             |         |
| Yes                | 2967     | 71,81 | 9847      | 62,42 | 12814 | 1,71 | 1,562-1,869 | <0,001  |
| No                 | 708      | 17,13 | 4014      | 25,44 | 4722  | -    | -           | -       |
| <b>Sore throat</b> |          |       |           |       |       |      |             |         |
| Yes                | 704      | 17,04 | 3502      | 22,20 | 4206  | 0,77 | 0,700-0,843 | <0,001  |
| No                 | 2248     | 54,40 | 8592      | 54,46 | 10840 | -    | -           | -       |
| <b>Dyspnea</b>     |          |       |           |       |       |      |             |         |
| Yes                | 3082     | 74,59 | 6558      | 41,57 | 9640  | 4,57 | 4,177-5,012 | <0,001  |

|                              |      |       |       |       |       |      |             |        |
|------------------------------|------|-------|-------|-------|-------|------|-------------|--------|
| No                           | 654  | 15,83 | 6367  | 40,36 | 7021  | -    | -           | -      |
| <b>Respiratory Distress</b>  |      |       |       |       |       |      |             |        |
| Yes                          | 2429 | 58,79 | 5171  | 32,78 | 7600  | 3,51 | 3,231-3,810 | <0,001 |
| No                           | 972  | 23,52 | 7260  | 46,02 | 8232  | -    | -           | -      |
| <b>O2 Saturation &lt;95%</b> |      |       |       |       |       |      |             |        |
| Yes                          | 2490 | 60,26 | 3610  | 22,88 | 6100  | 5,62 | 5,174-6,100 | <0,001 |
| No                           | 1036 | 25,07 | 8438  | 53,49 | 9474  | -    | -           | -      |
| <b>Puke</b>                  |      |       |       |       |       |      |             |        |
| Yes                          | 354  | 8,57  | 1491  | 9,45  | 1845  | 0,94 | 0,831-1,064 | 0,331  |
| No                           | 2539 | 61,45 | 1057  | 6,70  | 3596  | -    | -           | -      |
| <b>Diarrhea</b>              |      |       |       |       |       |      |             |        |
| Yes                          | 342  | 8,28  | 1429  | 9,06  | 1771  | 0,95 | 0,837-1,076 | 0,411  |
| No                           | 2550 | 61,71 | 10108 | 64,07 | 12658 | -    | -           | -      |
| <b>Other Symptoms</b>        |      |       |       |       |       |      |             |        |
| Yes                          | 1652 | 39,98 | 6745  | 42,75 | 8397  | 0,98 | 0,906-1,064 | 0,653  |
| No                           | 1373 | 33,23 | 5504  | 34,89 | 6877  | -    | -           | -      |

133

134 Among the pre-existing comorbidities in pregnant and postpartum women with Covid-19, the  
 135 diagnosis of heart disease (OR=1.49; CI=1.282-1.721), asthma (OR=1.45; CI=1.205-1.735), diabetes  
 136 (OR=1.20; CI=1.039-1.381), obesity (OR=2.37; CI=2.053-2.733), kidney disease (OR=1.69;  
 137 CI=1.132-2.510) or the simple presence of comorbidity (OR=1.53; CI=1.423-1.639) were associated  
 138 with a maternal near miss (Table 3).

139

140 Table 3 – Univariate analysis of hospitalizations of pregnant and postpartum women with Covid-19  
 141 according to pre-existing comorbidities. Brazil, 2020-2022

|                               | UTI      |       | Infirmary |       | Total | OR   | IC          | p-value |
|-------------------------------|----------|-------|-----------|-------|-------|------|-------------|---------|
|                               | n (4132) | %     | n (15776) | %     |       |      |             |         |
| <b>Comorbidities</b>          |          |       |           |       |       |      |             |         |
| Yes                           | 2604     | 63,02 | 8320      | 52,74 | 10924 | 1,53 | 1,423-1,639 | <0,001  |
| No                            | 1528     | 36,98 | 7456      | 47,26 | 8984  | -    | -           | -       |
| <b>Cardiopathy</b>            |          |       |           |       |       |      |             |         |
| Yes                           | 304      | 7,36  | 729       | 4,62  | 1033  | 1,49 | 1,282-1,721 | <0,001  |
| No                            | 1312     | 31,75 | 4674      | 29,63 | 5986  | -    | -           | -       |
| <b>Haematological disease</b> |          |       |           |       |       |      |             |         |
| Yes                           | 28       | 0,68  | 65        | 0,41  | 93    | 1,46 | 0,935-2,286 | 0,096   |
| No                            | 1512     | 36,59 | 5132      | 32,53 | 6644  | -    | -           | -       |
| <b>Down syndrome</b>          |          |       |           |       |       |      |             |         |
| Yes                           | 7        | 0,17  | 23        | 0,15  | 30    | 1,03 | 0,440-2,397 | 0,952   |
| No                            | 1531     | 37,05 | 5164      | 32,73 | 6695  | -    | -           | -       |
| <b>Liver disease</b>          |          |       |           |       |       |      |             |         |
| Yes                           | 10       | 0,24  | 32        | 0,20  | 42    | 1,06 | 0,520-2,161 | 0,873   |
| No                            | 1516     | 36,69 | 5141      | 32,59 | 6657  | -    | -           | -       |
| <b>Asthma</b>                 |          |       |           |       |       |      |             |         |
| Yes                           | 184      | 4,45  | 439       | 2,78  | 623   | 1,45 | 1,205-1,735 | <0,001  |
| No                            | 1406     | 34,03 | 4851      | 30,75 | 6257  | -    | -           | -       |
| <b>Diabetes</b>               |          |       |           |       |       |      |             |         |
| Yes                           | 314      | 7,60  | 895       | 5,67  | 1209  | 1,20 | 1,039-1,381 | 0,013   |

|                             |      |       |      |       |      |      |             |        |
|-----------------------------|------|-------|------|-------|------|------|-------------|--------|
| No                          | 1332 | 32,24 | 4548 | 28,83 | 5880 | -    | -           | -      |
| <b>Obesity</b>              |      |       |      |       |      |      |             |        |
| Yes                         | 380  | 9,20  | 592  | 3,75  | 972  | 2,37 | 2,053-2,733 | <0,001 |
| No                          | 1268 | 30,69 | 4679 | 29,66 | 5947 | -    | -           | -      |
| <b>Neurological disease</b> |      |       |      |       |      |      |             |        |
| Yes                         | 32   | 0,77  | 75   | 0,48  | 107  | 1,45 | 0,954-2,201 | 0,082  |
| No                          | 1504 | 36,40 | 5109 | 32,38 | 6613 | -    | -           | -      |
| <b>Pneumopatias</b>         |      |       |      |       |      |      |             |        |
| Yes                         | 29   | 0,70  | 75   | 0,48  | 104  | 1,31 | 0,852-2,024 | 0,217  |
| No                          | 1505 | 36,42 | 5112 | 32,40 | 6617 | -    | -           | -      |
| <b>Immunodeficiency</b>     |      |       |      |       |      |      |             |        |
| Yes                         | 34   | 0,82  | 123  | 0,78  | 157  | 0,94 | 0,639-1,378 | 0,747  |
| No                          | 1491 | 36,08 | 5063 | 32,09 | 6554 | -    | -           | -      |
| <b>Kidney disease</b>       |      |       |      |       |      |      |             |        |
| Yes                         | 37   | 0,90  | 75   | 0,48  | 112  | 1,69 | 1,132-2,510 | 0,010  |
| No                          | 1486 | 35,96 | 5078 | 32,19 | 6564 | -    | -           | -      |

142

143

144

145

146

147

148

149

150

151

Regarding the analysis of clinical characteristics of pregnant and postpartum women hospitalized with Covid-19, it was associated with ICU admission being postpartum (OR=1.41; CI=1.299-1.538), having received invasive ventilatory support (OR=94.77; CI=79.039-113.644), non-invasive ventilation (OR=5.53; CI=5.044-6.068), not having been vaccinated against influenza (OR=1.40; CI=1.243-1.585) and/or against Covid-19 (OR=1.71; CI=1.520-1.924) and having received antiviral treatment (OR=1.14; CI=1.003-1.290) (Table 4).

Table 4 – Univariate Analysis of Hospitalizations of Pregnant and Postpartum Women with Covid-19 by Clinical Characteristics Brazil, 2020-2022

|                             | UTI      |       | Infirmity |       | Total | OR    | IC             | p-value |
|-----------------------------|----------|-------|-----------|-------|-------|-------|----------------|---------|
|                             | n (4132) | %     | n (15776) | %     |       |       |                |         |
| <b>Obstetric Population</b> |          |       |           |       |       |       |                |         |
| Pregnant                    | 3219     | 77,90 | 13139     | 83,28 | 16358 | -     | -              | -       |
| Postpartum                  | 913      | 22,10 | 2637      | 16,72 | 3550  | 1,41  | 1,299-1,538    | <0,001  |
| <b>Ventilatory support</b>  |          |       |           |       |       |       |                |         |
| Invasive                    | 1217     | 29,45 | 159       | 1,01  | 1376  | 94,77 | 79,039-113,644 | <0,001  |
| Non-invasive                | 1928     | 46,66 | 4315      | 27,35 | 6243  | 5,53  | 5,044-6,068    | <0,001  |
| No                          | 735      | 17,79 | 9101      | 57,69 | 9836  | -     | -              | -       |
| <b>Nosocomial Infection</b> |          |       |           |       |       |       |                |         |
| Yes                         | 59       | 1,43  | 187       | 1,19  | 246   | 1,24  | 0,926-1,671    | 0,148   |
| No                          | 3203     | 77,52 | 12626     | 80,03 | 15829 | -     | -              | -       |
| <b>Flu vaccine</b>          |          |       |           |       |       |       |                |         |
| Yes                         | 420      | 10,16 | 2620      | 16,61 | 3040  | -     | -              | -       |
| No                          | 1119     | 27,08 | 4973      | 31,52 | 6092  | 1,4   | 1,243-1,585    | <0,001  |



**Covid\* Vaccine**

|     |      |       |      |       |      |      |             |        |
|-----|------|-------|------|-------|------|------|-------------|--------|
| Yes | 447  | 10,82 | 2537 | 16,08 | 2984 | -    | -           | -      |
| No  | 1318 | 31,90 | 4374 | 27,73 | 5692 | 1,71 | 1,520-1,924 | <0,001 |

**Antiviral**

|     |      |       |       |       |       |      |             |       |
|-----|------|-------|-------|-------|-------|------|-------------|-------|
| Yes | 350  | 8,47  | 1242  | 7,87  | 1592  | 1,14 | 1,003-1,290 | 0,045 |
| No  | 2750 | 66,55 | 11097 | 70,34 | 13847 | -    | -           | -     |

152 \* The vaccine against COVID-19 was not made available to pregnant and postpartum women in Brazil until April 2021,  
 153 with a gradual introduction between regions of the country and between age groups, which means that many pregnant  
 154 and postpartum women in the study population did not receive the vaccine until the time of hospitalization (MINISTRY  
 155 OF HEALTH, 2021).  
 156

157 In logistic regression analysis, the independent significant factors associated with a near miss  
 158 in pregnant and postpartum women with Covid-19 were being black/brown (ORaj=0.83; CI=0.720-  
 159 0.966), having O2 saturation <95% (ORaj=1.92; CI=1.609-2.299), presenting dyspnea (ORaj=1.47;  
 160 CI=1.216-1.778), having comorbidities (ORaj=1.49; CI=1.282-1.737), requiring invasive  
 161 mechanical ventilation (ORaj=44.99; CI=33.099-61.167), requiring non-invasive mechanical  
 162 ventilation (ORaj=3.32; CI=2.754-3.994), and not having been vaccinated against influenza  
 163 (ORaj=1.18; CI=1.006-1.390), with all these factors controlled by yellow and indigenous race/color  
 164 (Table 5).

165

166 Table 5 – Final multiple logistic regression model of factors associated with outcome in hospitalized  
 167 pregnant and postpartum women with Covid-19, according to ICU admission. Brazil, 2020-2022

|                                   | ORaj* | IC(95%)       | p      |
|-----------------------------------|-------|---------------|--------|
| <b>Maternal characteristics</b>   |       |               |        |
| Race/black/brown color            | 0,83  | 0,720-0,966   | 0,016  |
| <b>Signs and symptoms</b>         |       |               |        |
| O2 Saturation <95%                | 1,92  | 1,609-2,299   | <0,001 |
| Dyspnea                           | 1,47  | 1,216-1,778   | <0,001 |
| <b>Pre-existing comorbidities</b> |       |               |        |
| Comorbidity present               | 1,49  | 1,282-1,737   | <0,001 |
| <b>Clinical features</b>          |       |               |        |
| Invasive ventilatory support      | 44,99 | 33,099-61,167 | <0,001 |
| Noninvasive ventilatory support   | 3,32  | 2,754-3,994   | <0,001 |
| Not having a flu vaccine          | 1,18  | 1,006-1,390   | 0,042  |

168 \* Adjusted for yellow and indigenous race/color.

169

170 **DISCUSSION**

171

172 This study was able to identify the characteristics of women who developed a maternal near  
173 miss due to Covid-19. Factors associated with maternal near misses were black/brown color, history  
174 of comorbidities, O2 saturation <95%, dyspnea, need for invasive and non-invasive ventilatory  
175 support, and no influenza vaccination.

176 Regarding the socio-demographic profile, black and brown women were predominant,  
177 demonstrating that they are more susceptible to Covid-19 infection. However, the proportion of  
178 black and brown women admitted to intensive care was lower, which may be related to their lack of  
179 access to health services and technologies. The smaller number of black and brown pregnant and  
180 postpartum women admitted to ICU beds compared with those admitted to wards confounded the  
181 odds ratio, and black/brown race/color could be confused with a protective factor. However, a large  
182 body of literature shows the opposite, with whites being the most hospitalized population and  
183 black/browns having higher mortality rates.<sup>20</sup>

184 In this sense, the historical difficulties of this population group in accessing the health system  
185 are notorious, as evidenced by unfavorable indicators such as maternal mortality, since they represent  
186 approximately 65% of the total maternal deaths in the country.<sup>21</sup>

187 Another important aspect is the social inequality between whites and blacks/brown. A survey  
188 conducted during the pandemic showed that the per capita household income of the white Brazilian  
189 population is much higher. In July 2020, the per capita income of whites was R\$ 1,639.00, while that  
190 of the black and brown population was R\$ 971.00.<sup>22</sup> Therefore, social inequalities deserve attention  
191 due to their strong relationship with situational health indicators.

192 In terms of signs and symptoms, there was a predominance of O2 saturation <95% and  
193 dyspnea. Physiologically and anatomically, pregnant women undergo pregnancy-related changes that

194 increase the risk of complications and death from Covid-19. Pulmonary physiology undergoes  
195 hormonal and functional changes that make it less tolerant to hypoxia. In early pregnancy,  
196 progesterone levels act on the brainstem to increase respiratory rate and tidal volume, and chest wall  
197 compliance and airway resistance decrease. In the last trimester, the uterus constricts the diaphragm,  
198 reducing total lung capacity.<sup>23</sup>

199 In addition to these respiratory changes, there are important immunologic changes that place  
200 pregnant and postpartum women at risk for developing more severe respiratory infections, which can  
201 lead to hypoxemia, which in combination with pulmonary infection can lead to vasoconstriction and  
202 worsening of the condition.<sup>23</sup>

203 Dyspnea is very common in Covid-19, reported in 81% of hospitalized patients. The presence  
204 of this symptom is related to the severity of the disease, being less common in the early phase.<sup>24</sup> When  
205 present, dyspnea occurs because the disease uses angiotensin-converting enzyme 2 (ACE 2) as a  
206 receptor, which is widely distributed in pulmonary, intestinal, renal, and vascular tissues. As a result,  
207 cytokines are released that damage lung, kidney, and heart tissue and worsen organ system function.<sup>25</sup>

208 Among pre-existing comorbidities, cardiac disease, hematologic disease, diabetes, asthma,  
209 neurologic disease, renal disease, pulmonary disease, and obesity are considered risk factors for  
210 adverse outcomes in coronavirus-infected patients.<sup>26-27</sup>

211 In this regard, the present study found that most pregnant and postpartum women had  
212 comorbidities. A review of 77 studies concluded that advanced maternal age, high body mass index,  
213 and previous comorbidities were the most relevant risk factors in pregnant women who developed  
214 the most severe form of the disease and required intensive care. These findings suggest a risk profile  
215 for adverse maternal outcomes such as ICU admission and clinical deterioration, which may progress  
216 to death.<sup>28</sup>

217 Among the most relevant clinical characteristics, the use of ventilatory support (invasive and  
218 noninvasive) stands out. Studies conducted in Brazil showed that 20% of pregnant and postpartum

219 women with the severe acute respiratory syndrome (SARS) required ICU admission, 22% required  
220 noninvasive ventilation, and 10 to 25% required invasive ventilation.<sup>29-30</sup>

221 In light of Covid-19 and SARS, ventilatory support has become a common requirement in the  
222 management of affected patients. In several contexts, the use of invasive techniques for oxygenation  
223 was higher than that of non-invasive techniques, with a significant increase in 2021, due to the  
224 prolonged and fatal nature of the disease, indicating the intensification of care to reverse the severe  
225 condition.<sup>31</sup>

226 Regarding vaccination against influenza (H1N1), an association has been observed with  
227 hospitalizations for Covid-19. In this sense, unvaccinated patients had a higher risk of ICU admission,  
228 confirming studies showing that vaccination reduces the number of positive tests for Covid-19 and  
229 improves clinical outcomes.<sup>32</sup>

230 Another study suggests that influenza vaccination is associated with a lower risk of  
231 cardiovascular events and reduces the likelihood of overlapping secondary infections, as patients with  
232 Covid-19 can acquire the influenza virus at the same time.<sup>33</sup>

233 Although some international studies have shown high morbidity and mortality in pregnant and  
234 postpartum women with the severe form of COVID-19, the clinical course of the disease in pregnant  
235 women from other countries has not shown a significant increase in the rate of outcomes with worse  
236 prognosis compared to the general population and the Brazilian reality.<sup>34-35</sup>

237 As a result, WHO, together with the American College of Gynecology and Obstetrics,  
238 observed an increase in weekly deaths among pregnant and postpartum women and included this  
239 group as a priority in the country's vaccination campaigns as an important preventive measure, given  
240 that the effectiveness of the vaccine is comparable to that of nonpregnant women.<sup>36</sup> In light of these  
241 findings and the pandemic scenario, it is essential that health services promote the vaccination of the  
242 obstetric population, which has been shown to have an impact on the development of severe cases,  
243 particularly respiratory disease.

244 Given these findings and the pandemic scenario, health services must promote the vaccination  
245 of the obstetric population, which has been shown to have a positive impact on the development of  
246 severe cases, particularly those with respiratory failure requiring ventilatory support and invasive  
247 ventilation, reaffirming the importance of vaccination against Covid-19.

248 It is also necessary to implement new protocols and preventive measures aimed at combating  
249 and preventing new transmissions of the virus, culminating in new configurations and adaptations of  
250 assistance to pregnant and postpartum women. In addition, policies that address racial inequalities  
251 are essential to contribute to the improvement of care, which must comply with the principles of the  
252 Single Health System (SUS) in terms of universality, inclusiveness, and equity.

253 It is worth mentioning that the present study has some limitations, mainly related to the use of  
254 secondary data, which are subject to underreporting or completion problems. However, the health  
255 information systems of the Brazilian Ministry of Health are of great value, as they allow the  
256 epidemiological study of diseases at the national level, which helps in the planning of health policies  
257 and programs. In addition, during the Covid-19 pandemic, SIVEP-Influenza was the main source of  
258 data on Covid-19 hospitalizations in the country.

259

## 260 **CONCLUSION**

261

262 ICU admissions of pregnant and postpartum women with Covid-19, considered in this study  
263 as maternal near misses, were associated with black and brown race/color, with O<sub>2</sub> saturation <95%,  
264 with dyspnea, with comorbidities, with a need for invasive or non-invasive ventilatory support, and  
265 with lack of influenza vaccination.

266 In this sense, recognition of the factors involved in maternal near misses can help to direct  
267 actions to qualify the care of women in pregnancy and the puerperium. In addition, it allows us to  
268 identify which women are more likely to have a fatal outcome, thus allowing early intervention.

269

## 270 ACKNOWLEDGEMENTS

271

272 We would like to thank the Universidade Estadual de Maringá for their support in carrying out the  
273 research and the Centro Universitário Uningá and Duke University for the partnership.

274

## 275 REFERENCES

276

277 1. Organização Mundial da Saúde (OMS). OMS declara pandemia do novo Coronavírus.

278 Universidade Aberta do Sus (UNA-SUS). 11 de março de 2020 [Cited 2022 jan 23].

279 Available from: [https://www.unasus.gov.br/noticia/organizacao-mundial-de-saude-declara-](https://www.unasus.gov.br/noticia/organizacao-mundial-de-saude-declara-pandemia-de-coronavirus)  
280 [pandemia-de-coronavirus.](https://www.unasus.gov.br/noticia/organizacao-mundial-de-saude-declara-pandemia-de-coronavirus)

281

282 2. Zaigham M, Andersson O. (2020). Resultados maternos e perinatais com COVID-19: Uma

283 revisão sistemática de 108 gestações. Acta Obstet Gynecol Scand. Available from:

284 <https://doi.org/10.1111/aogs.13867>.

285

286 3. Yan J, Guo J, Fan C, et al. (2020). Coronavirus disease 2019 in pregnant women: a report

287 based on 116 cases. Am J Obstet Gynecol, Available from:

288 <https://pubmed.ncbi.nlm.nih.gov/32335053/>

289

290 4. Fernandes JN, Rezende MCD, Otsubo BYV, et al. (2022). Correlation between COVID-19

291 and gestational complications: a systematic review. Brazilian Journal of Health Review, v5,

292 n 2, 6405-6411 [Cited 2023 apr 11]. Available from: <https://doi.org/10.34119/bjhrv5n2-213>

293

- 294 5. Fundação Oswaldo Cruz (Fiocruz). (2021). Boletim Extraordinário, 25 de junho de 2021.  
295 [Cited 2022 jan 24]. Available from:  
296 [https://agencia.fiocruz.br/sites/agencia.fiocruz.br/files/u34/boletim\\_extraordinario\\_2021-](https://agencia.fiocruz.br/sites/agencia.fiocruz.br/files/u34/boletim_extraordinario_2021-junho-23-parte2-pags09-17.pdf)  
297 [junho-23-parte2-pags09-17.pdf](https://agencia.fiocruz.br/sites/agencia.fiocruz.br/files/u34/boletim_extraordinario_2021-junho-23-parte2-pags09-17.pdf)  
298
- 299 6. Bastos, LS, Niquini RP, Lana RM, et al. (2020) COVID-19 and hospitalizations for SARI in  
300 Brazil: a comparison up to the 12th epidemiological week of 2020. Cad Saúde Pública.  
301 Available from:  
302 <https://www.scielo.br/j/csp/a/KQxzHZdFHcPx5CftPXZKwgs/?format=pdf&lang=en>  
303
- 304 7. Almeida JP, Santana VS, Santos KM, et al. (2021). Internações por SRAG e óbitos por  
305 Covid-19 em gestantes brasileiras: uma análise da triste realidade. Brazilian Journal of  
306 Health Review. Available from:  
307 <https://www.brazilianjournals.com/index.php/BJHR/article/view/31570>  
308
- 309 8. Motta CT (2021). Subsidies for the compliance of SDG 3.1 of the 2030 Agenda: an analysis  
310 of maternal mortality in Brazil from 1996 to 2018. M. Sc. Dissertação, Escola Nacional de  
311 Saúde Pública Sérgio Arouca. Available from:  
312 [https://www.arca.fiocruz.br/bitstream/handle/icict/48404/caio\\_tavares\\_motta\\_ensp\\_mest\\_20](https://www.arca.fiocruz.br/bitstream/handle/icict/48404/caio_tavares_motta_ensp_mest_2021.pdf;jsessionid=8396E5143894CDCB6684F3F1C8D35951?sequence=2)  
313 [21.pdf;jsessionid=8396E5143894CDCB6684F3F1C8D35951?sequence=2](https://www.arca.fiocruz.br/bitstream/handle/icict/48404/caio_tavares_motta_ensp_mest_2021.pdf;jsessionid=8396E5143894CDCB6684F3F1C8D35951?sequence=2)  
314
- 315 9. Instituto de Pesquisa Econômica Aplicada (IPEA). ODS – Metas Nacionais dos Objetivos  
316 de Desenvolvimento Sustentável. 2018. [Cited 2022 jan 24]. Available from:  
317 [https://repositorio.ipea.gov.br/bitstream/11058/8855/1/Agenda\\_2030\\_ods\\_metas\\_nac\\_dos\\_o](https://repositorio.ipea.gov.br/bitstream/11058/8855/1/Agenda_2030_ods_metas_nac_dos_obj_de_desenv_susten_propos_de_adequa.pdf)  
318 [bj\\_de\\_desenv\\_susten\\_propos\\_de\\_adequa.pdf](https://repositorio.ipea.gov.br/bitstream/11058/8855/1/Agenda_2030_ods_metas_nac_dos_obj_de_desenv_susten_propos_de_adequa.pdf)

319

320 10. Observatório Obstétrico Brasileiro (OOBr). Óbitos de Gestantes e Puérperas. 2022. [Cited  
321 2022 jan 24]. Available from: [https://observatorioobstetrico.shinyapps.io/obitos-grav-  
322 puerp](https://observatorioobstetrico.shinyapps.io/obitos-grav-<br/>322 puerp) .

323

324 11. Souza ASR, Amorim MMR. (2021). Maternal mortality by Covid-19 in Brazil. Rev Bras  
325 Saúde Matern Infant. Available from:  
326 <https://www.scielo.br/j/rbsmi/a/R7MkrmCgdmyMpBcL7x77QZd/?format=pdf&lang=en>

327

328 12. Organização Mundial da Saúde (OMS). Avaliação da qualidade do cuidado nas  
329 complicações graves da gestação: A abordagem do near miss da OMS para a saúde materna.  
330 2011. [Cited 2022 jan 27]. Available from: [https://www.paho.org/clap/dmdocuments/CLAP-  
331 Trad05pt.pdf](https://www.paho.org/clap/dmdocuments/CLAP-<br/>331 Trad05pt.pdf)

332

333 13. Lima R. (2021). Direito sexuais e direitos reprodutivos das mulheres. Escola de Assistência  
334 Jurídica da Defensoria Pública. [Cited 2022 aug 18]. Available from: [Cartilha Direito  
335 Sexuais e Reprodutivos Das Mulheres | PDF \(scribd.com\)](#)

336

337 14. Malta M, Cardoso LO, Bastos FI et al. (2010) STROBE initiative: guidelines on reporting  
338 observational studies. Rev Saude Publica, v. 44, n. 3, p. 559–565. DOI: [\[OBJ\]](#)

339

340 15. Instituto Brasileiro de Geografia e Estatística (IBGE). (2022). Projeção da população do  
341 Brasil e das Unidades da Federação. [Cited 2022 jun 21]. Available from:  
342 <https://ibge.gov.br/apps/populacao/projecao/>

343



- 344 16. Brasil. (2008). Ministério da Saúde. Portaria nº 1,119, de 5 de junho de 2008. Regulamenta  
345 a vigilância de óbitos maternos. [Cited 2022 jun 21]. Available from:  
346 [https://bvsmms.saude.gov.br/bvs/saudelegis/gm/2008/prt1119\\_05\\_06\\_2008.html](https://bvsmms.saude.gov.br/bvs/saudelegis/gm/2008/prt1119_05_06_2008.html)  
347
- 348 17. Bahia. Secretária da Saúde do Estado da Bahia. Guia Rápido SIVEP – Gripe. 2020. [Cited  
349 2022 jun 14]. Available from: [https://docs.bvsalud.org/biblioref/2021/03/1147534/guia-  
351 rapido-sivep-gripe\\_agosto-2020.pdf](https://docs.bvsalud.org/biblioref/2021/03/1147534/guia-<br/>350 rapido-sivep-gripe_agosto-2020.pdf)
- 352 18. Garson GD. (2014). Logistic Regression: Binary & Multinomial [Cited 2022 aug 21].  
353 Available from:  
354 [file:///C:/Users/marci/Downloads/Logistic%20Regression\\_%20Binary%20and%20Multino  
356 mial%20\(%20PDFDrive%20\).pdf](file:///C:/Users/marci/Downloads/Logistic%20Regression_%20Binary%20and%20Multino<br/>355 mial%20(%20PDFDrive%20).pdf)
- 357 19. Brasil. (2016). Resolução nº 510, de 7 de abril de 2016. [Cited 2022 jun 21]. Available  
358 from: <https://conselho.saude.gov.br/resolucoes/2016/Reso510.pdf>  
359
- 360 20. Zeiser FA, Donida B, Costa CA, et al. (2022) First and second COVID-19 waves in Brazil:  
361 A cross-sectional study of patients’ characteristics related to hospitalization and in-hospital  
362 mortality. *The Lancet Regional Health - Americas*, v. 6, n. November, p. 1–16, 2022. DOI:  
363 <https://doi.org/10.1016/j.lana.2021.100107>  
364
- 365 21. Lima LCBB. (2021). A ocorrência de falhas assistenciais durante o trabalho de parto: uma  
366 revisão integrativa. Trabalho de Conclusão de Curso. Pontifícia Universidade Católica de  
367 Goiás. [Cited 2023 mar 07]. Available from:  
368 <https://repositorio.pucgoias.edu.br/jspui/handle/123456789/2510?mode=full>

369

370 22. Instituto de Pesquisa Econômica e Aplicada (IPEA). (2021). A pandemia de Covid-19 e a  
371 desigualdade racial de renda. Boletim de Análise Político-Institucional, n. 26, março 2021.  
372 [Cited 2023 mar 08]. Available from:  
373 [https://repositorio.ipea.gov.br/bitstream/11058/10519/1/BAPI\\_26\\_DesRacial.pdf](https://repositorio.ipea.gov.br/bitstream/11058/10519/1/BAPI_26_DesRacial.pdf)

374

375 23. Czeresnia RM, Trad ATA, Britto ISW, et al. (2020). Sars-Cov2 and Pregnancy: a review of  
376 the facts. Rev Bras Ginecol Obstet, v42, n9, 562-568. [Cited 2022 aug 21]. Available from:  
377 <https://doi.org/10.1055/s-0040-1715137>

378

379 24. Nascimento IJB, Groote TC, O’Mathúna DP, et al. (2020). Clinical, laboratory and  
380 radiological characteristics and outcomes of nves coronavírus (SARS-CoV-2) infection in  
381 humans: A systematic review and series of meta-analyses. PLoS One. [Cited 2022 aug 22].  
382 Available from: [10.1371/journal.pone.0239235](https://doi.org/10.1371/journal.pone.0239235)

383

384 25. Hoffmann M, Kleine-Weber H, Schoeder S, et al. (2020) SARS-CoV-2 cell entry depends  
385 on ACE2 and TMPRSS2 and is blocked by a clinically proven protease inhibitor. Cell, v  
386 181, 271-280. [Cited 2022 Aug 22]. Available from:  
387 <https://doi.org/10.1016/j.cell.2020.02.052>

388

389 26. Elshafeey F, Magdi R, Hindi N, et al. (2020). Asistematic scoping review of Covid-19  
390 during pregnancy and childbirth. International Journal of Gynecology & Obstetrics, v1, n2.  
391 [Cited 2022 Aug 21]. Available from: <https://doi.org/10.1002/ijgo.13182>

392

- 393 27. Jering KS, Claggett BL, Cunningham JW, et al. (2021). Clinical characteristics and  
394 outcomes of hospitalized women giving birth and without Covid-19. *JAMA Intern Med*,  
395 181, v 5, 714-717. [Cited 2022 aug 21]. Available from:  
396 <https://doi.org/10.1001/jamainternmed.2020.9241>  
397
- 398 28. Allotey J, Fernandez S, Bonet M, et al. (2020). Clinical manifestations, risk factors, and  
399 maternal and perinatal outcomes of coronavirus disease 2019 in pregnancy: living  
400 systematic review meta-analysis. *The BMJ*, 370, m3320. [Cited 2022 aug 22]. Available  
401 from: Available from: <https://doi.org/10.1136/bmj.m3320>  
402
- 403 29. Godoi APN, Bernardes GCS, Almeida NA, et al. (2021) Severe Acute Respiratory  
404 Syndrome by COVID-19 in pregnant and postpartum women. *Rev Bras Saúde Matern Infant*,  
405 v 21, n 2, 5461-5469. [Cited 2022 aug 22]. Available from: [https://doi.org/10.1590/1806-](https://doi.org/10.1590/1806-9304202100S200008)  
406 [9304202100S200008](https://doi.org/10.1590/1806-9304202100S200008)  
407
- 408 30. Leal LF, Merckx J, Fell DB, et al. (2021). Characteristics and outcomes of pregnant woman  
409 with SARS-CoV-2 infection and other severe acute respiratory infections (SARI) in Brazil  
410 from January to November 2020. *Braz J Infect Dis*. [Cited 2022 aug 24]. Available from:  
411 [10.1016/j.bjid.2021.101620](https://doi.org/10.1016/j.bjid.2021.101620)  
412
- 413 31. Takemoto MLS, Menezes MO, Andreucci CB, et al. (2020). The tragedy of COVID-19 in  
414 Brazil: 124 maternal deaths and counting. *Int J Gynaecol Obstet*, v 151, n 1, 154-156. [Cited  
415 2022 aug 22]. Available from: Available from: <https://doi.org/10.1002/ijgo.13300>  
416

- 417 32. Conlon A, Ashur C, Washer L. et al. (2021). Impacto f the influenza vaccine on Covid-19  
418 infection rates and severity. American Journal of Infection Control, v 49, 694-700. [Cited  
419 2022 aug 22]. Available from: <https://doi.org/10.1016/j.ajic.2021.02.012>  
420
- 421 33. Behrouzi B, Campoverde MVA, Liang K, et al. (2020). Influenza Vaccination to Reduce  
422 Cardiovascular Morbidity and Mortality in Patients With COVID-19. Journal of the  
423 American College of Cardiology, v. 76, n. 15, p. 1–19, 2020. DOI:  
424 [10.1016/j.jacc.2020.08.028](https://doi.org/10.1016/j.jacc.2020.08.028)  
425
- 426 34. Dashraath P, Wong JLJ, Lim MXK, et al. (2020). Coronavirus Disease 2019 (COVID-19)  
427 pandemic and pregnancy. Am J Obstet Gynecol, v 222, n 6, 521-531. [Cited 2022 aug 18].  
428 Available from: <https://doi.org/10.106/j.ajog.2020.03.021>  
429
- 430 35. Pacagnella RCP, Nakamura-Pereira M, Gomes-Sponholz F, et al. (2018). Maternal mortality  
431 in Brazil: Proposals and strategies for its reduction. Rev Bras Ginecol Obstet, v 40, 501-  
432 506). [Cited 2022 aug 18]. Available from: <https://doi.org/10.1055/s-0038-1672181>  
433
- 434 36. Rodrigues FO, Antunes Neto A, Silva RG, et al. (2021). Desfechos maternos da COVID-19  
435 e atualizações sobe a vacinação em gestantes e puérperas. Revista Brazilian Journal of  
436 Development, v 7, n 6, 57232-57247. [Cited 2021 jan 27]. Available from:  
437 <https://doi.org/10.34117/bjdv7n6-227>  
438  
439  
440
